# Supplementary material for: Reactions of HOCO radicals through hydrogen-atom hopping utilizing clathrate hydrates as an observational matrix
Source: Royal Society of Chemistry journal article supplement (doi:10.1039/c3cp54680b), 2013-12-18
Supplement: c3cp54680b.pdf [file c3cp54680b.pdf]

## **Electronic Supplementary Information for Reactions of HOCO Radicals through Hydrogen-Atom Hopping Utilizing Clathrate Hydrates as an Observational Matrix**

**Motoi Oshima,<sup>\*a</sup> Atsushi Tani <sup>\*a</sup> Takeshi Sugahara,<sup>b</sup> Katsuhisa Kitano<sup>c</sup> and Kazunari Ohgaki<sup>d</sup>**

<sup>a</sup>Department of Earth and Space Science, Graduate School of Science, Osaka University, 1-1 Machikaneyama, Toyonaka, Osaka 560-0043, Japan

<sup>b</sup>Division of Chemical Engineering, Graduate School of Engineering Science, Osaka University, 1-3 Machikaneyama, Toyonaka, Osaka 560-8531, Japan

<sup>c</sup>Center for Atomic and Molecular Technologies, Graduate School of Engineering, Osaka University, 2-1 Yamadaoka, Suita, Osaka 565-0871, Japan

*\*E-mail address:* moto-o@astroboy.ess.sci.osaka-u.ac.jp (Motoi Oshima)

*E-mail address:* atani@ess.sci.osaka-u.ac.jp (Atsushi Tani)

### I. Information of induced radicals on ESR measurements

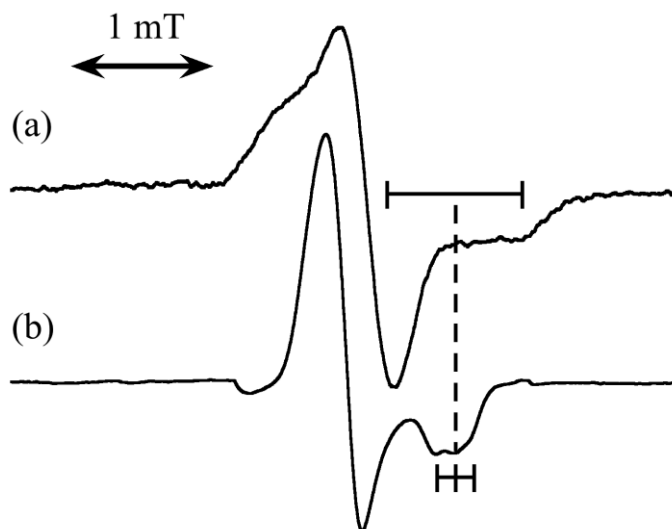

**Figure S1.** ESR spectra magnified at *Signal (i)* in Fig. 1, recorded at 77 K after annealing at 170 K for 15 min. (a) Irradiated CO<sub>2</sub> hydrate prepared with H<sub>2</sub>O, (b) irradiated CO<sub>2</sub> hydrate prepared with D<sub>2</sub>O.

Figure S1 (a) and (b) show ESR spectra magnified at *Signal (i)*, which was recorded at 77 K after annealing at 170 K for 15 min in the irradiated CO<sub>2</sub> hydrates prepared with H<sub>2</sub>O and D<sub>2</sub>O, respectively. HOCO and/or CO<sub>2</sub> anion (CO<sub>2</sub><sup>-</sup>) radicals are mainly formed from CO<sub>2</sub> and H<sub>2</sub>O in the magnetic field range of Fig. S1.<sup>1</sup> *Signal (i)* has a similar *g*-factor as that of the HOCO and CO<sub>2</sub><sup>-</sup> radicals. Hyperfine constants of hydrogen ( $A_{\text{H}} = 0.93$  mT) and deuterium ( $A_{\text{D}} = 0.13$  mT) around  $g = 1.9974$  are observed on the peak of signals in the high magnetic field of Fig. S1. When the CO<sub>2</sub><sup>-</sup> radical is induced in CO<sub>2</sub> hydrate, the spectral shapes in Fig. S1 (a) and (b) should show the same ones; however, they are intrinsically different. Therefore, the signals in Fig. S1 (a) and (b) are assigned to HOCO and DOCO radicals, respectively. The spectrum of the hydrogen atom (*Signal (ii)*) in Fig. 1 (a) is observed at  $g = 2.0025$  with a large hyperfine constant ( $A = 50.3$  mT). The spectrum of the OH radical (*Signal (iii)*) in Fig. 1 (a) is observed at  $g$ -parallel ( $g_{\parallel}$ ) = 2.0479, though  $g$ -perpendicular ( $g_{\perp}$ ) is only partially observed due to the overlap with *Signal (i)*. These radicals are induced in CO<sub>2</sub> hydrate through the following reactions.

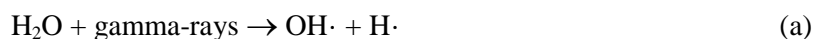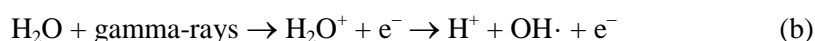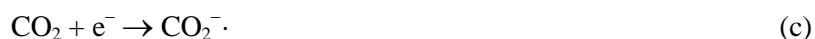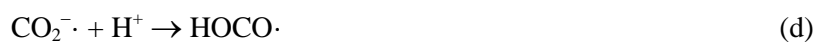

Generally, hydrogen atom, OH radical, H<sub>2</sub>O cation (H<sub>2</sub>O<sup>+</sup>) and electron (e<sup>-</sup>) are induced by the radiolytic reaction of H<sub>2</sub>O (reaction (a) and (b)). H<sub>2</sub>O<sup>+</sup> is unstable at 77 K, and can quickly decompose to proton (H<sup>+</sup>) and OH radical (reaction (b)). HOCO radical would be formed by additional reactions of CO<sub>2</sub> with secondary electron (reaction (c)) and proton induced from H<sub>2</sub>O (reaction (d)) because the direct addition of a hydrogen atom to CO<sub>2</sub> is endothermic.

## II. Thermal stabilities of HOCO radicals

Figure 2 indicates that the decay process is not readily achieved and consists of at least two steps. The spectral shape of *Signal (i)* slightly changes at an early stage at each annealing temperature. The change in the spectral shape may be caused by overlap of less stable signals of HOCO radicals. Most results show that the unstable factors decreased with the annealing time within the range denoted by the open markers shown in Fig. 2, and the data sets represented by solid markers are used for the discussion of the more stable HOCO radicals.

## REFERENCES

- (1) Tseng, S.S.; Chang, S. *Origins Life Evol. B.* **1975**, *6*, 61–73.
